# Supplementary material for: Protein flexibility is required for vesicle tethering at the Golgi
Source: eLife journal article supplement (doi:10.7554/elife.12790), 2015-12-14
Supplement: supp [file elife-12790-supp-v1.zip]

```

classdef afmprocessing

    methods(Static)
        function imtopoFlat=flattenTopo_median(imtopo)
            % flattenTopo_median. Flatten topography image by removing
            % median of each row and column
            % imtopo: a matrix of pixel heights
            % imtopoFlat: the matrix of pixel heights corresponding to
            % flattened image

            [n1,n2]=size(imtopo);

            %first remove lines of zeros. Necessary when scan aborted
            %before completion, in which case the recorded image has a
            %of lines filled with zeros
            keepline=ones(n1,1);
            for i=1:n1
                if any(imtopo(i,:)==0)
                    keepline(i)=0;
                end
            end

            imtopo=imtopo(find(keepline),:);
            imtopoFlat=imtopo;

            %then remove median row and column wise
            med1=median(imtopo,2);

            for i=1:n2
                imtopoFlat(:,i)=imtopoFlat(:,i)-med1;
            end
            med2=median(imtopoFlat,1);
            for i=1:n1
                imtopoFlat(i,:)=imtopoFlat(i,:)-med2;
            end
        end

        function flattenTopo_median_batch(pathroot,filesmask)
            % flattenTopo_median_batch: apply flattenTopo_median to a
            % of images.
            % pathroot : folder containing the images to flatten,
            % text files containing matrix of heights.
            % filesmask : filter for file selection in the folder. Ex:
            % '*.txt'
            cdir=pwd;
    
```

```

cd(pathroot);
imgs=dir(filesmask);
imnames={imgs.name};
nims=length(imnames);

for i=1:nims
    fprintf(1,'Processing image %g out of %g : %s
\n',i,nims,imnames{i});

    im2flattenName=[pathroot '/' imnames{i}];
    immat=load(im2flattenName); %this is a matrix of
double representing the height expressed in meters
    immat=immat*1e9; %to get the height in nm;

    display('Flattening topography...');
    imflat=afmprocessing.flattenTopo_median(immat);

    imsavename=[pathroot '/' imnames{i}(1:end-4)
'_flat.mat'];
    save(imsavename,'imflat');
end

    cd(cdir);

end

end

end

```
